# Supplementary material for: Size resolved characteristics of urban and suburban bacterial bioaerosols in Japan as assessed by 16S rRNA amplicon sequencing
Source: PubMed Central journal article supplement (PMC7376176; doi:10.1038/s41598-020-68933-z), 2020-07-22
Supplement: 41598_2020_68933_MOESM1_ESM.pdf [file 41598_2020_68933_MOESM1_ESM.pdf]

## Supplementary Information

### Size resolved characteristics of urban and suburban bacterial bioaerosols in Japan as assessed by 16S rRNA amplicon sequencing

Daisuke Tanaka<sup>1</sup>, So Fujiyoshi<sup>2,3</sup>, Fumito Maruyama<sup>2,3</sup>, Motoshi Goto<sup>1</sup>, Shinichi Koyama<sup>4</sup>, Jun-ichi Kanatani<sup>5</sup>, Junko Isobe<sup>5</sup>, Masanori Watahiki<sup>5</sup>, Akihiro Sakatoku<sup>1</sup>, Shigehiro Kagaya<sup>1</sup> & Shogo Nakamura<sup>1</sup>

<sup>1</sup>Graduate School of Science and Engineering, University of Toyama, Toyama, Japan.

<sup>2</sup>JST/JICA, Science and Technology Research Partnership for Sustainable Development Program (SATREPS), Tokyo, Japan.

<sup>3</sup>Office of Academic Research and Industry-Government Collaboration, Hiroshima University, Hiroshima, Japan.

<sup>4</sup>Murata Keisokuki Service Co., Ltd., Yokohama, Japan.

<sup>5</sup>Department of Bacteriology, Toyama Institute of Health, Toyama, Japan.

Correspondence and requests for materials should be addressed to D. Tanaka  
(email: tanakada@sci.u-toyama.ac.jp)

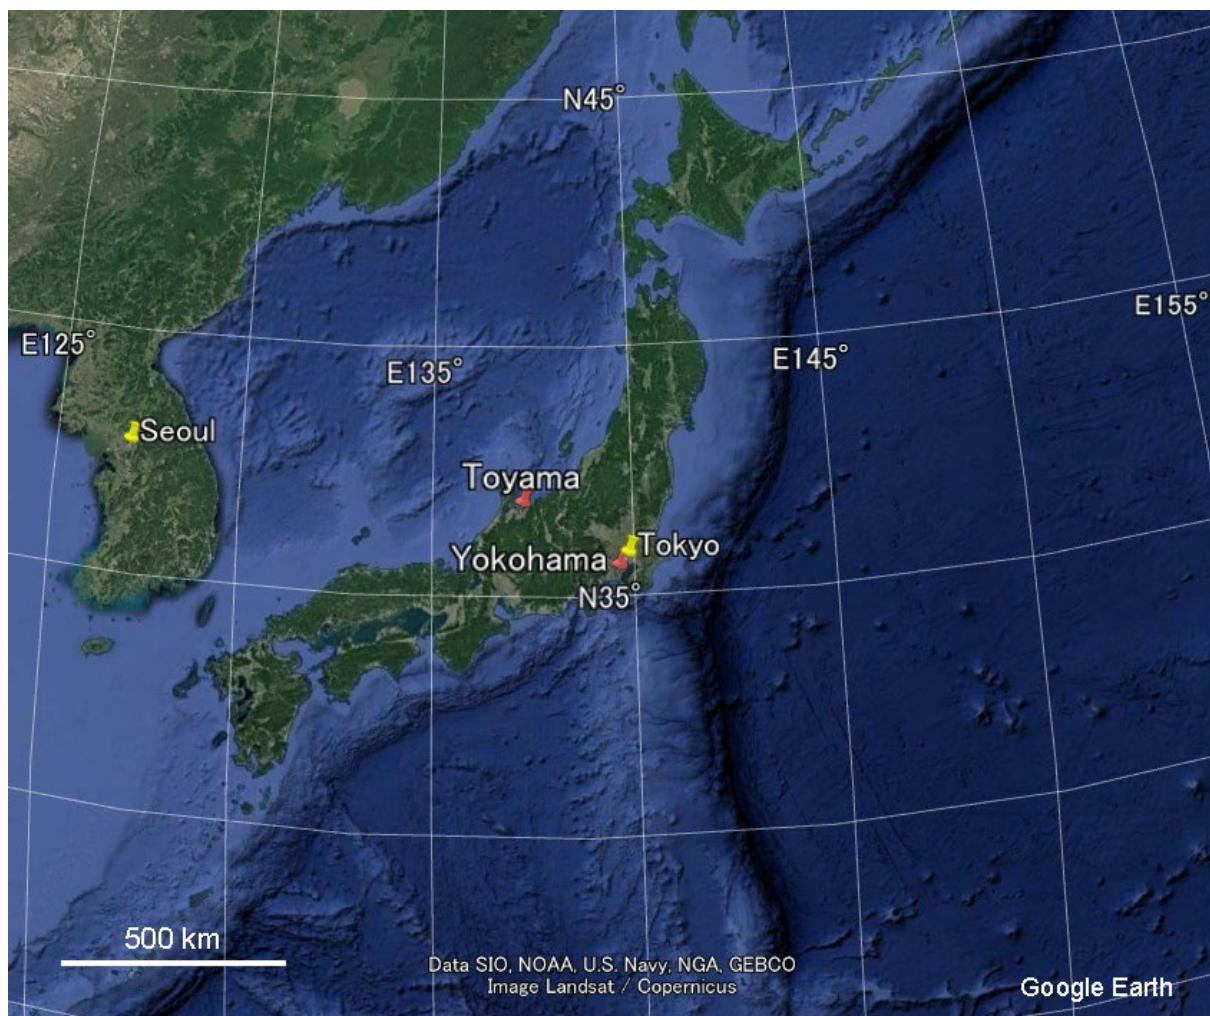

Figure S1. Map showing the sampling locations at a suburban site in Toyama City and an urban site in Yokohama City, Japan. The two sites were located about 250 km apart from one another. The sampling sites were located on the roofs of buildings.

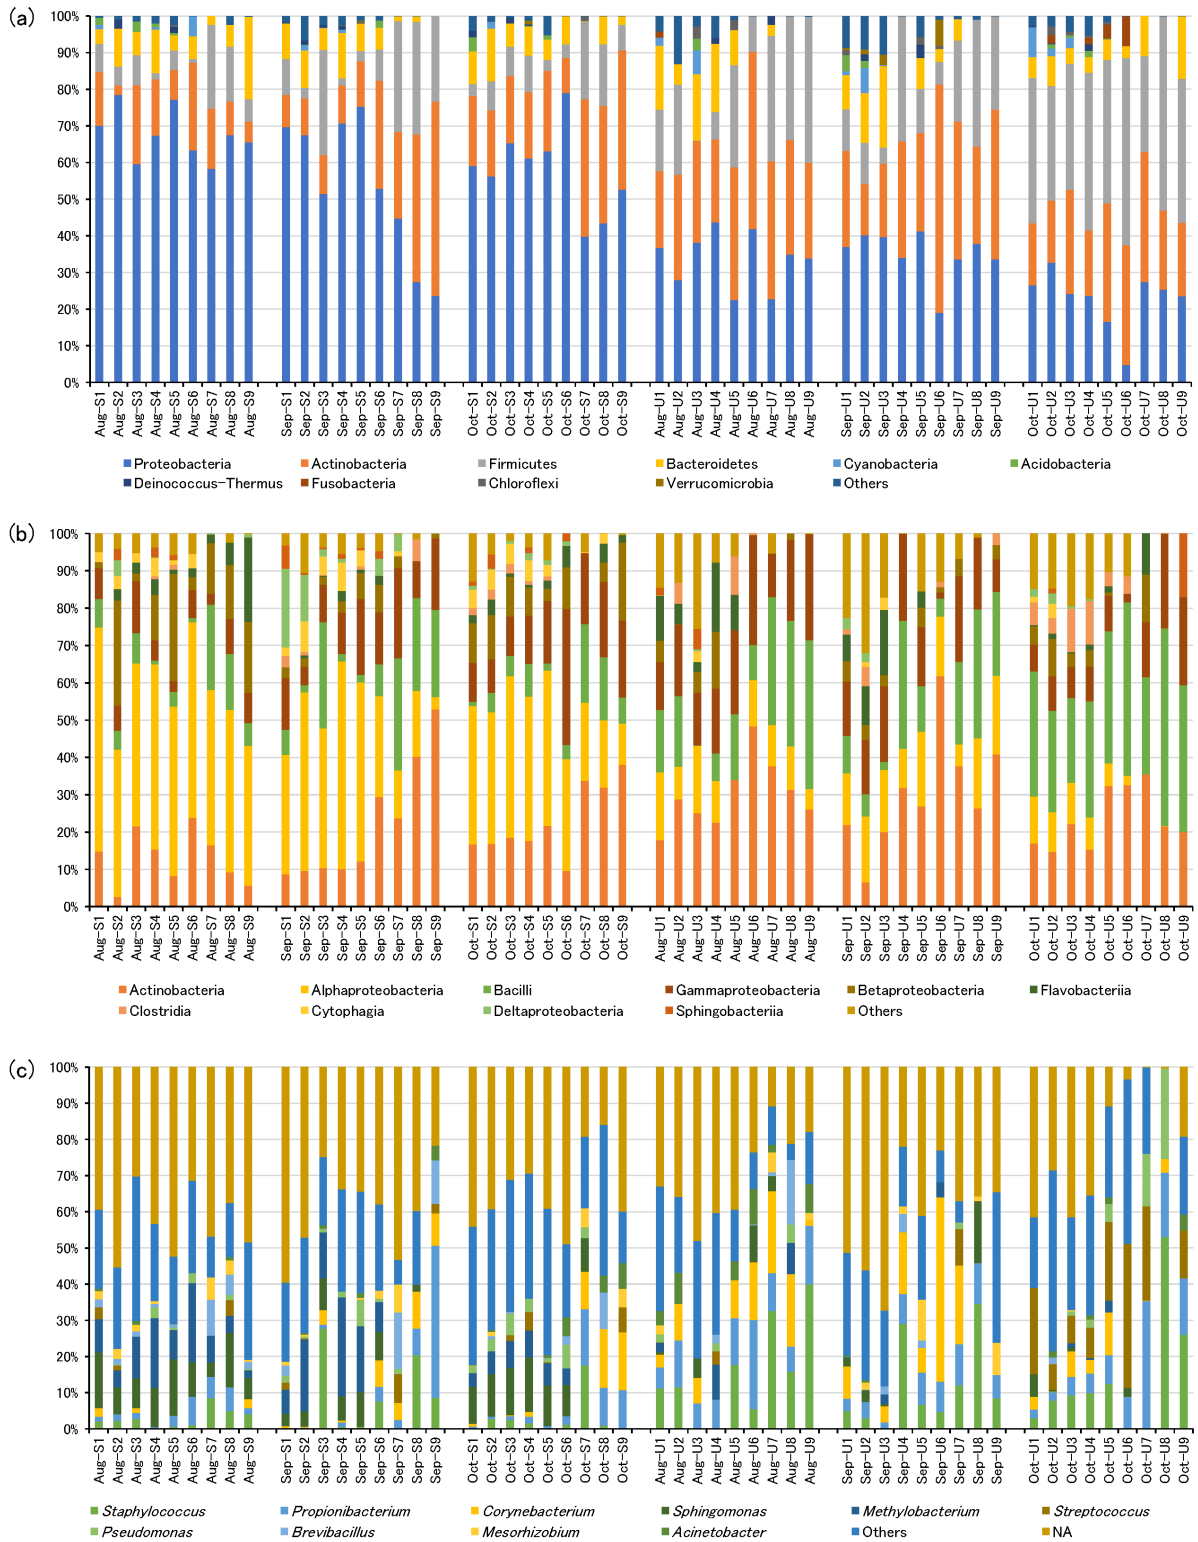

Figure S2. Taxonomic composition of bacteria at the phylum (a), class (b), and genus (c) levels in air samples collected at the suburban (S) and urban (U) sites. NA, not assigned.

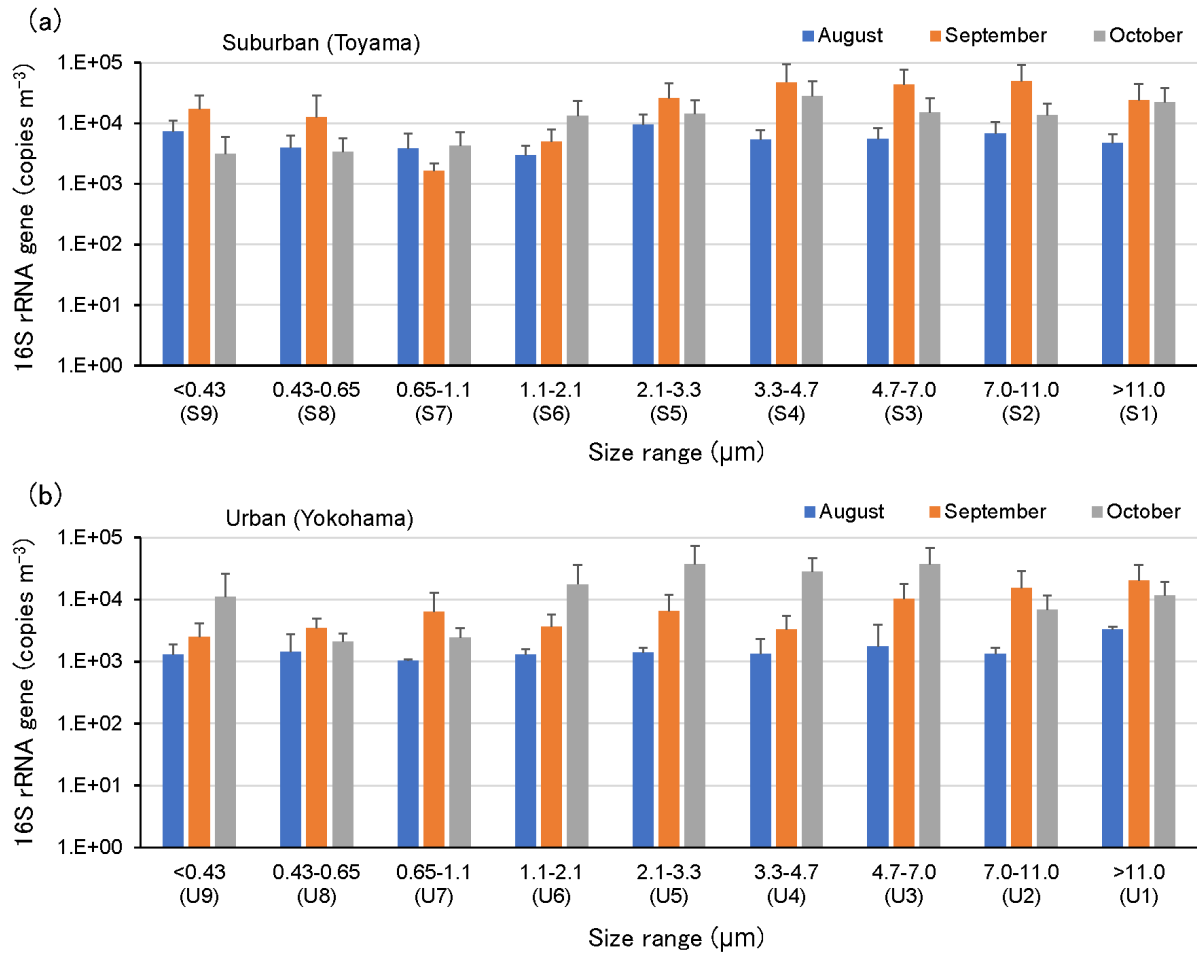

Figure S3. Quantification of the total bacterial 16S rRNA genes in air samples collected at the suburban (a) and urban (b) sites using real-time TaqMan PCR.

Table S1. Sampling information

| Location | Date<br>(2016) | Sample          | Average<br>temperature<br>(°C) | Average<br>relative<br>humidity (%) | Average wind<br>velocity (m/s) | Predominant<br>wind<br>direction | Precipitation<br>(mm) |
|----------|----------------|-----------------|--------------------------------|-------------------------------------|--------------------------------|----------------------------------|-----------------------|
| Toyama   | Aug 31         | Aug-S1 ~ Aug-S9 | 27.6                           | 43.5                                | 3.8                            | SSW                              | 0                     |
|          | Sep 27         | Sep-S1 ~ Sep-S9 | 25.6                           | 83.7                                | 2.0                            | NNE                              | 3                     |
|          | Oct 25         | Oct-S1 ~ Oct-S9 | 19.0                           | 73.1                                | 5.5                            | S                                | 4.5                   |
| Yokohama | Aug 31         | Aug-U1 ~ Aug-U9 | 27.1                           | 65.5                                | 5.0                            | SSW                              | 0                     |
|          | Sep 27         | Sep-U1 ~ Sep-U9 | 26.7                           | 84.8                                | 3.1                            | SSW                              | 0                     |
|          | Oct 25         | Oct-U1 ~ Oct-U9 | 16.4                           | 84.3                                | 2.4                            | N                                | 3                     |

Table S2. Summary of Illumina MiSeq reads

| Sample | Raw sequences | Number of clean sequences | OTUs <sup>a</sup> | Good's coverage |
|--------|---------------|---------------------------|-------------------|-----------------|
| Aug-S1 | 44,967        | 27,607                    | 539               | 99.99%          |
| Aug-S2 | 45,936        | 25,494                    | 331               | 99.99%          |
| Aug-S3 | 35,904        | 22,083                    | 318               | 99.99%          |
| Aug-S4 | 39,079        | 27,056                    | 509               | 99.97%          |
| Aug-S5 | 45,231        | 30,576                    | 545               | 99.98%          |
| Aug-S6 | 43,795        | 31,687                    | 466               | 99.99%          |
| Aug-S7 | 35,747        | 29,088                    | 187               | 99.99%          |
| Aug-S8 | 34,667        | 24,404                    | 363               | 100.00%         |
| Aug-S9 | 47,898        | 35,302                    | 292               | 99.99%          |
| Aug-U1 | 48,373        | 36,798                    | 228               | 99.97%          |
| Aug-U2 | 39,145        | 27,558                    | 116               | 99.97%          |
| Aug-U3 | 48,035        | 37,814                    | 222               | 99.95%          |
| Aug-U4 | 43,837        | 30,998                    | 154               | 99.98%          |
| Aug-U5 | 38,277        | 28,568                    | 101               | 99.99%          |
| Aug-U6 | 36,753        | 27,626                    | 277               | 99.99%          |
| Aug-U7 | 32,525        | 22,748                    | 200               | 99.99%          |
| Aug-U8 | 32,827        | 24,494                    | 149               | 99.98%          |
| Aug-U9 | 28,368        | 22,668                    | 89                | 99.98%          |
| Sep-S1 | 44,305        | 30,888                    | 300               | 100.00%         |
| Sep-S2 | 54,494        | 35,557                    | 428               | 99.99%          |
| Sep-S3 | 45,492        | 31,623                    | 540               | 99.99%          |
| Sep-S4 | 42,476        | 29,093                    | 521               | 100.00%         |
| Sep-S5 | 46,393        | 31,221                    | 585               | 100.00%         |
| Sep-S6 | 29,603        | 21,624                    | 268               | 99.98%          |
| Sep-S7 | 39,936        | 30,534                    | 113               | 99.99%          |
| Sep-S8 | 43,041        | 24,998                    | 124               | 99.97%          |
| Sep-S9 | 42,490        | 34,193                    | 164               | 99.99%          |
| Sep-U1 | 50,894        | 28,918                    | 242               | 99.94%          |
| Sep-U2 | 52,764        | 37,736                    | 217               | 99.97%          |
| Sep-U3 | 48,207        | 32,398                    | 175               | 99.98%          |
| Sep-U4 | 34,491        | 26,920                    | 112               | 99.97%          |
| Sep-U5 | 41,724        | 31,266                    | 171               | 99.97%          |
| Sep-U6 | 34,689        | 27,391                    | 70                | 99.97%          |
| Sep-U7 | 36,235        | 26,725                    | 120               | 99.99%          |
| Sep-U8 | 30,711        | 25,576                    | 253               | 99.98%          |
| Sep-U9 | 34,653        | 27,626                    | 98                | 99.98%          |
| Oct-S1 | 69,202        | 45,313                    | 659               | 99.99%          |
| Oct-S2 | 48,779        | 33,804                    | 591               | 99.98%          |
| Oct-S3 | 53,339        | 37,317                    | 615               | 99.99%          |
| Oct-S4 | 46,565        | 31,452                    | 654               | 99.99%          |
| Oct-S5 | 50,931        | 37,418                    | 581               | 99.99%          |
| Oct-S6 | 49,033        | 35,752                    | 368               | 99.97%          |
| Oct-S7 | 42,507        | 34,037                    | 224               | 99.97%          |
| Oct-S8 | 41,474        | 33,927                    | 139               | 99.97%          |
| Oct-S9 | 51,658        | 40,033                    | 136               | 99.99%          |
| Oct-U1 | 55,383        | 40,267                    | 232               | 99.96%          |
| Oct-U2 | 55,693        | 38,218                    | 188               | 99.98%          |
| Oct-U3 | 49,489        | 33,133                    | 334               | 99.95%          |
| Oct-U4 | 37,340        | 26,401                    | 358               | 99.98%          |
| Oct-U5 | 48,102        | 36,682                    | 347               | 99.98%          |
| Oct-U6 | 41,182        | 33,585                    | 232               | 99.97%          |
| Oct-U7 | 21,444        | 17,478                    | 94                | 99.99%          |
| Oct-U8 | 23,909        | 19,721                    | 143               | 99.99%          |
| Oct-U9 | 31,982        | 26,254                    | 128               | 99.96%          |

<sup>a</sup> The operational taxonomic units (OTUs) were defined with 3 % dissimilarity.

Table S3. *Legionella* -assigned OTUs in air samples collected using size-resolved samplers

| OTU ID                                  | Sample ID |        |        |        |        |        |        |        |        | Total   |
|-----------------------------------------|-----------|--------|--------|--------|--------|--------|--------|--------|--------|---------|
|                                         | Aug-S4    | Aug-S5 | Aug-S8 | Aug-S9 | Aug-U3 | Sep-U3 | Oct-S5 | Oct-U2 | Oct-U4 |         |
| OTU 17607                               | 1         | 3      | 0      | 0      | 0      | 0      | 0      | 0      | 0      | 4       |
| OTU 20992                               | 41        | 94     | 0      | 22     | 0      | 0      | 74     | 0      | 1      | 232     |
| OTU 7592                                | 0         | 4      | 0      | 1      | 0      | 0      | 0      | 0      | 0      | 5       |
| OTU 8382                                | 0         | 0      | 0      | 0      | 0      | 0      | 0      | 540    | 0      | 540     |
| OTU 10500                               | 0         | 0      | 0      | 0      | 0      | 390    | 0      | 0      | 0      | 390     |
| OTU 22832                               | 0         | 166    | 47     | 24     | 0      | 0      | 0      | 0      | 0      | 237     |
| OTU 1583                                | 0         | 3      | 0      | 0      | 0      | 0      | 0      | 0      | 0      | 3       |
| OTU 10828                               | 0         | 0      | 2      | 1      | 0      | 0      | 0      | 0      | 0      | 3       |
| Others                                  | 6         | 6      | 5      | 6      | 2      | 1      | 7      | 3      | 0      | 36      |
| Total                                   | 48        | 276    | 54     | 54     | 2      | 391    | 81     | 543    | 1      | 1450    |
| Number of clean sequences               | 27,056    | 30,576 | 24,404 | 35,302 | 37,814 | 32,398 | 37,418 | 38,218 | 26,401 | 289,587 |
| Detection rate of <i>Legionella</i> (%) | 0.177%    | 0.903% | 0.221% | 0.153% | 0.005% | 1.207% | 0.216% | 1.421% | 0.004% |         |
